# Supplementary material
Source: publisher figshare collection journal article supplement (https://tandf.figshare.com/articles/dataset/_/4246139)
Supplement: Supplementary file 1 [file 1]

**Supplementary Table 2.** Within and between-group results for PPI and seed-based resting state analyses.

|  | **Healthy controls** | | **Anatomy a** | | | **Stats b** | | | **AN patients** | | **Anatomy a** | | | **Stats b** | | | **Group**  **comparisons** | | **Anatomy a** | | | **Stats b** | | |
| --- | --- | --- | --- | --- | --- | --- | --- | --- | --- | --- | --- | --- | --- | --- | --- | --- | --- | --- | --- | --- | --- | --- | --- | --- |
|  |
|  |  |  | **x** | **y** | **z** | KE | mm3 | Z |  |  | **x** | **y** | **z** | KE | mm3 | Z |  |  | **x** | **y** | **z** | KE | mm3 | Z |
|  | **Looking at my own body > looking at another’s body** | **SEED COORDINATES (x,y,z): 0,-34,44** |  |  |  |  |  |  |  |  |  |  |  |  |  |  |  |  |  |  |  |  |  |  |
|  | Angular gyrus | -50 | -70 | 30 | 49 | 392 | 3.10 |  | No areas |  |  |  |  |  |  |  | **AN patients > Healthy controls** |  |  |  |  |  |  |
|  |  |  |  |  |  |  |  |  |  |  |  |  |  |  |  |  | Anterior cingulate cortex | 4 | 46 | 4 | 53 | 424 | 3.20 |
|  | **SEED COORDINATES (x,y,z): 0,-60,42** |  |  |  |  |  |  |  |  |  |  |  |  |  |  |  |  |  |  |  |  |  |  |
|  | No areas |  |  |  |  |  |  |  | No areas |  |  |  |  |  |  |  | No areas |  |  |  |  |  |  |
|  | **SEED COORDINATES (x,y,z): 6,-48,36** |  |  |  |  |  |  |  |  |  |  |  |  |  |  |  |  |  |  |  |  |  |  |
|  | No areas |  |  |  |  |  |  |  | No areas |  |  |  |  |  |  |  | No areas |  |  |  |  |  |  |
|  | **Looking at another’s body > looking at my own body** | **SEED COORDINATES (x,y,z): 0,-34,44** |  |  |  |  |  |  |  |  |  |  |  |  |  |  |  |  |  |  |  |  |  |  |
|  | Medial superior frontal gyrus- Anterior cingulate cortex | 4 | 46 | 4 | 58 | 464 | 3.37 |  | Precuneus | 12 | -68 | 46 | 53 | 424 | 3.49 |  |  |  |  |  |  |  |  |
|  | Precuneus | 4 | -62 | 44 | 61 | 488 | 3.02 |  | Inferior frontal cortex-Insula | -44 | 22 | -2 | 71 | 568 | 3.29 |  |  |  |  |  |  |  |  |
|  |  |  |  |  |  |  |  |  | Middle -anterior cingulate cortex | 2 | 28 | 32 | 34 | 272 | 3.01 |  |  |  |  |  |  |  |  |
| **PPI ANALYSES** |  |  |  |  |  |  |  |  | Middle temporal gyrus | -60 | -36 | -4 | 38 | 304 | 2.93 |  |  |  |  |  |  |  |  |
| **SEED COORDINATES (x,y,z): 0,-60,42** |  |  |  |  |  |  |  |  |  |  |  |  |  |  |  |  |  |  |  |  |  |  |
| No areas |  |  |  |  |  |  |  | Superior frontal gyrus | 0 | 0 | 52 | 376 | 3008 | 4.30 |  | **AN patients > Healthy controls** |  |  |  |  |  |  |
|  |  |  |  |  |  |  |  |  | 2 | 10 | 40 |  |  | 4.11 |  | Middle temporal gyrus | -60 | -36 | 0 | 37 | 296 | 2.90 |
|  |  |  |  |  |  |  |  |  | 4 | 20 | 40 |  |  | 3.81 |  |  |  |  |  |  |  |  |
|  |  |  |  |  |  |  |  | Middle temporal gyrus | -62 | -36 | 0 | 65 | 520 | 3.58 |  |  |  |  |  |  |  |  |
|  |  |  |  |  |  |  |  | Cuneus/Precuneus | 14 | -74 | 34 | 52 | 416 | 3.16 |  |  |  |  |  |  |  |  |
|  |  |  |  |  |  |  |  |  | 14 | -66 | 32 |  |  | 2.96 |  |  |  |  |  |  |  |  |
|  |  |  |  |  |  |  |  |  |  | 12 | -66 | 40 |  |  | 2.81 |  |  |  |  |  |  |  |  |
|  | **SEED COORDINATES (x,y,z): 6,-48,36** |  |  |  |  |  |  |  |  |  |  |  |  |  |  |  |  |  |  |  |  |  |  |
|  | Inferior parietal cortex | -26 | -50 | 52 | 21 | 168 | 4,09 |  | Supplementary motor area/Mid cingulate gyrus | 0 | 0 | 52 | 286 | 2288 | 4,17 |  | No areas |  |  |  |  |  |  |
|  | Supramarginal gyrus | 62 | -26 | 24 | 22 | 176 | 3,10 |  |  | 2 | 8 | 44 |  |  | 3,51 |  |  |  |  |  |  |  |  |
|  | Temporal inferior gyrus | 44 | -62 | -10 | 30 | 240 | 2,98 |  |  | 4 | 22 | 38 |  |  | 3,43 |  |  |  |  |  |  |  |  |
|  |  |  |  |  |  |  |  |  | Mid temporal gyrus | -64 | -36 | 0 | 43 | 344 | 3,42 |  |  |  |  |  |  |  |  |
|  |  |  |  |  |  |  |  |  | Parietal inferior cortex | -42 | -48 | 50 | 21 | 168 | 3,01 |  |  |  |  |  |  |  |  |
|  |  |  |  |  |  |  |  |  | Mid-anterior cingulate cortex | 8 | 30 | 28 | 23 | 184 | 2,88 |  |  |  |  |  |  |  |  |
|  |  |  |  |  |  |  |  |  |  | 2 | 26 | 34 |  |  | 2,87 |  |  |  |  |  |  |  |  |
|  |  |  |  |  |  |  |  |  | Precuneus/Cuneus | 12 | -66 | 38 | 28 | 224 | 2,85 |  |  |  |  |  |  |  |  |
|  | **Looking at my own body> looking at another’s body** | **SEED COORDINATES (x,y,z): 0,-34,44** |  |  |  |  |  |  |  |  |  |  |  |  |  |  |  |  |  |  |  |  |  |  |
|  |  |  |  |  |  |  |  |  |  |  |  |  |  |  |  |  | **Healthy controls> AN patients** |  |  |  |  |  |  |
|  | Middle and superior frontal gyrus | 24 | 38 | 40 | 108 | 864 | 4.39 |  | Precuneus | 18 | -72 | 34 | 96 | 768 | 3.65 |  | Angular gyrus | 34 | -62 | 48 | 42 | 336 | 3.09 |
|  |  | 24 | 20 | 48 |  |  | 3.35 |  |  | 12 | -70 | 44 |  |  | 2.69 |  |  |  |  |  |  |  |  |
|  |  | 30 | 30 | 42 |  |  | 3.07 |  |  |  |  |  |  |  |  |  |  |  |  |  |  |  |  |
|  | Inferior parietal cortex- angular gyrus | 56 | -48 | 44 | 165 | 1320 | 4.37 |  |  |  |  |  |  |  |  |  |  |  |  |  |  |  |  |
|  |  | 42 | -52 | 48 |  |  | 3.75 |  |  |  |  |  |  |  |  |  |  |  |  |  |  |  |  |
|  |  | 50 | -42 | 44 |  |  | 3.66 |  |  |  |  |  |  |  |  |  |  |  |  |  |  |  |  |
|  | Inferior parietal cortex | -40 | -48 | 50 | 52 | 416 | 4.08 |  |  |  |  |  |  |  |  |  |  |  |  |  |  |  |  |
|  |  | -28 | -52 | 52 |  |  | 2.69 |  |  |  |  |  |  |  |  |  |  |  |  |  |  |  |  |
|  | Precuneus | 10 | -66 | 48 | 120 | 960 | 3.93 |  |  |  |  |  |  |  |  |  |  |  |  |  |  |  |  |
|  |  | 12 | -66 | 36 |  |  | 3.07 |  |  |  |  |  |  |  |  |  |  |  |  |  |  |  |  |
|  |  | 12 | -74 | 38 |  |  | 3.06 |  |  |  |  |  |  |  |  |  |  |  |  |  |  |  |  |
|  | Angular gyrus | 32 | -64 | 44 | 92 | 736 | 4.74 |  |  |  |  |  |  |  |  |  |  |  |  |  |  |  |  |
|  |  | 38 | -58 | 50 |  |  | 4.31 |  |  |  |  |  |  |  |  |  |  |  |  |  |  |  |  |
| **RESTING STATE ANALYSES** |  |  |  |  |  |  |  |  |  |  |  |  |  |  |  |  |  |  |  |  |  |  |  |
| Angular gyrus | -46 | -60 | 42 | 101 | 808 | 3.23 |  |  |  |  |  |  |  |  |  |  |  |  |  |  |  |  |
|  | -38 | -66 | 42 |  |  | 2.79 |  |  |  |  |  |  |  |  |  |  |  |  |  |  |  |  |
| Superior frontal gyrus/Mid cingulate cortex | 4 | 24 | 44 | 109 | 872 | 3.53 |  |  |  |  |  |  |  |  |  |  |  |  |  |  |  |  |
|  | -4 | 22 | 42 |  |  | 3.37 |  |  |  |  |  |  |  |  |  |  |  |  |  |  |  |  |
| **SEED COORDINATES (x,y,z): 0,-60,42** |  |  |  |  |  |  |  |  |  |  |  |  |  |  |  |  |  |  |  |  |  |  |
| Angular gyrus | 42 | -70 | 38 | 570 | 4560 | 5,24 |  | Mid frontal gyrus | 26 | 26 | 38 | 123 | 984 | 5,43 |  | No areas |  |  |  |  |  |  |
|  | 46 | -72 | 24 |  |  | 4,26 |  | Mid occipital gyrus | -38 | -78 | 24 | 176 | 1408 | 4,62 |  |  |  |  |  |  |  |  |
|  | 44 | -62 | 32 |  |  | 4,04 |  |  | -44 | -74 | 20 |  |  | 3,84 |  |  |  |  |  |  |  |  |
| Angular gyrus | -40 | -76 | 24 | 553 | 4424 | 4,93 |  |  | -28 | -78 | 30 |  |  | 3,80 |  |  |  |  |  |  |  |  |
|  | -34 | -78 | 42 |  |  | 4,43 |  | Mid occipital gyrus | 42 | -70 | 30 | 208 | 1664 | 4,02 |  |  |  |  |  |  |  |  |
|  | -34 | -78 | 30 |  |  | 4,31 |  |  | 44 | -62 | 32 |  |  | 3,83 |  |  |  |  |  |  |  |  |
| Mid-Superior frontal gyrus | 28 | 28 | 40 | 144 | 1152 | 4,78 |  |  | 44 | -70 | 20 |  |  | 3,76 |  |  |  |  |  |  |  |  |
|  | 24 | 38 | 40 |  |  | 3,32 |  | Angular gyrus | 38 | -60 | 44 | 38 | 304 | 3,37 |  |  |  |  |  |  |  |  |
|  | Angular gyrus | 34 | -72 | 42 | 80 | 640 | 4,60 |  |  | 34 | -66 | 40 |  |  | 3,08 |  |  |  |  |  |  |  |  |
|  |  | 42 | -66 | 44 |  |  | 3,55 |  |  |  |  |  |  |  |  |  |  |  |  |  |  |  |  |
|  | Mid frontal gyrus | 32 | 14 | 52 | 44 | 352 | 3,93 |  |  |  |  |  |  |  |  |  |  |  |  |  |  |  |  |
|  | Mid frontal gyrus | -24 | 6 | 50 | 57 | 456 | 3,87 |  |  |  |  |  |  |  |  |  |  |  |  |  |  |  |  |
|  | Mid frontal gyrus | -22 | 18 | 46 | 122 | 976 | 3,72 |  |  |  |  |  |  |  |  |  |  |  |  |  |  |  |  |
|  |  | -28 | 26 | 48 |  |  | 3,65 |  |  |  |  |  |  |  |  |  |  |  |  |  |  |  |  |
|  | **SEED COORDINATES (x,y,z): 6,-48,36** |  |  |  |  |  |  |  |  |  |  |  |  |  |  |  |  |  |  |  |  |  |  |
|  | Mid and superior frontal gyrus | 26 | 34 | 40 | 156 | 1248 | 6,95 |  | Mid-Superior frontal gyrus | 28 | 28 | 40 | 131 | 1048 | 5,28 |  | No areas |  |  |  |  |  |  |
|  |  | Angular gyrus | 44 | -68 | 36 | 687 | 5496 | 6,46 |  | Angular gyrus | 44 | -70 | 28 | 679 | 5432 | 4,64 |  |  |  |  |  |  |  |  |
|  |  |  | 44 | -64 | 28 |  |  | 6,02 |  |  | 44 | -62 | 32 |  |  | 4,43 |  |  |  |  |  |  |  |  |
|  |  |  | 58 | -60 | 20 |  |  | 5,38 |  |  | 58 | -56 | 20 |  |  | 4,37 |  |  |  |  |  |  |  |  |
|  |  | Angular gyrus | 44 | -66 | 44 | 94 | 752 | 5,05 |  | Mid occipital gyrus | -42 | -82 | 26 | 134 | 1072 | 3,46 |  |  |  |  |  |  |  |  |
|  |  |  | 34 | -72 | 42 |  |  | 5,02 |  |  | -42 | -70 | 22 |  |  | 3,04 |  |  |  |  |  |  |  |  |
|  |  | Angular gyrus | -46 | -78 | 28 | 826 | 6608 | 4,80 |  |  |  |  |  |  |  |  |  |  |  |  |  |  |  |  |
|  |  |  | -34 | -78 | 42 |  |  | 4,80 |  |  |  |  |  |  |  |  |  |  |  |  |  |  |  |  |
|  |  |  | -38 | -76 | 32 |  |  | 4,57 |  |  |  |  |  |  |  |  |  |  |  |  |  |  |  |  |
|  |  | Superior frontal gyrus | 0 | 58 | 0 | 929 | 7432 | 4,22 |  |  |  |  |  |  |  |  |  |  |  |  |  |  |  |  |
|  |  |  | 12 | 50 | 36 |  |  | 4,10 |  |  |  |  |  |  |  |  |  |  |  |  |  |  |  |  |
|  |  |  | 6 | 52 | 22 |  |  | 3,88 |  |  |  |  |  |  |  |  |  |  |  |  |  |  |  |  |
|  |  | Mid frontal gyrus | -20 | 22 | 46 | 174 | 1392 | 4,14 |  |  |  |  |  |  |  |  |  |  |  |  |  |  |  |  |
|  |  |  | -24 | 34 | 48 |  |  | 3,09 |  |  |  |  |  |  |  |  |  |  |  |  |  |  |  |  |
|  |  | Mid temporal gyrus | 58 | -14 | -20 | 89 | 712 | 4,09 |  |  |  |  |  |  |  |  |  |  |  |  |  |  |  |  |
|  |  | Mid temporal gyrus | -60 | -14 | -18 | 56 | 448 | 3,80 |  |  |  |  |  |  |  |  |  |  |  |  |  |  |  |  |
|  | **Looking at another’s body > looking at my own body** | **SEED COORDINATES (x,y,z): 0,-34,44** |  |  |  |  |  |  |  |  |  |  |  |  |  |  |  |  |  |  |  |  |  |  |
|  | Superior temporal gyrus | -44 | -24 | 4 | 179 | 1432 | 4,83 |  | Insula | 38 | 24 | -10 | 217 | 1736 | 5,44 |  | No areas |  |  |  |  |  |  |
|  |  | -42 | -10 | 0 |  |  | 4,77 |  |  | 46 | 24 | -4 |  |  | 3,93 |  |  |  |  |  |  |  |  |
|  |  | -40 | -16 | 8 |  |  | 3,99 |  | Inferior frontal gyrus | -34 | 26 | -8 | 202 | 1616 | 3,67 |  |  |  |  |  |  |  |  |
|  | Insula | -38 | 26 | -4 | 284 | 2272 | 4,39 |  |  | -46 | 22 | 8 |  |  | 3,54 |  |  |  |  |  |  |  |  |
|  |  | -42 | 18 | 2 |  |  | 3,77 |  |  | -46 | 28 | -4 |  |  | 3,39 |  |  |  |  |  |  |  |  |
|  |  | -50 | 22 | -4 |  |  | 3,63 |  |  |  |  |  |  |  |  |  |  |  |  |  |  |  |  |
|  | Insula | 34 | 28 | -8 | 150 | 1200 | 4,19 |  |  |  |  |  |  |  |  |  |  |  |  |  |  |  |  |
|  |  | 46 | 8 | -4 |  |  | 3,11 |  |  |  |  |  |  |  |  |  |  |  |  |  |  |  |  |
|  |  | 38 | 16 | -6 |  |  | 2,70 |  |  |  |  |  |  |  |  |  |  |  |  |  |  |  |  |
|  |  |  |  |  |  |  |  |  |  |  |  |  |  |  |  |  |  |  |  |  |  |  |  |
|  | **SEED COORDINATES (x,y,z): 0,-60,42** |  |  |  |  |  |  |  |  |  |  |  |  |  |  |  |  |  |  |  |  |  |  |
|  | Superior temporal gyrus | 54 | -4 | 4 | 40 | 320 | 5,61 |  | Superior temporal gyrus | 56 | -2 | 6 | 40 | 320 | 5,73 |  | No areas |  |  |  |  |  |  |
|  | Superior temporal gyrus | -50 | -12 | 2 | 214 | 1712 | 4,88 |  | Superior temporal gyrus | -46 | -10 | 10 | 196 | 1568 | 5,17 |  |  |  |  |  |  |  |  |
|  |  | -50 | -30 | 8 |  |  | 4,77 |  |  | -52 | -10 | 4 |  |  | 4,98 |  |  |  |  |  |  |  |  |
|  |  | -42 | -14 | 14 |  |  | 4,72 |  |  | -50 | -22 | 12 |  |  | 4,39 |  |  |  |  |  |  |  |  |
|  | Insula | -40 | 22 | 4 | 365 | 2920 | 4,63 |  | Insula- Inferior frontal gyrus | 44 | 8 | -8 | 347 | 2776 | 5,17 |  |  |  |  |  |  |  |  |
|  |  | -38 | 14 | 4 |  |  | 4,45 |  |  | 38 | 22 | -10 |  |  | 5,08 |  |  |  |  |  |  |  |  |
|  |  | -44 | 14 | -6 |  |  | 4,04 |  |  | 30 | 18 | -2 |  |  | 4,42 |  |  |  |  |  |  |  |  |
|  | Insula | 46 | 8 | -8 | 261 | 2088 | 4,25 |  | Insula-Inferior frontal gyrus | -36 | 14 | 0 | 355 | 2840 | 4,99 |  |  |  |  |  |  |  |  |
|  |  | 46 | 22 | -10 |  |  | 4,21 |  |  | -44 | 14 | -6 |  |  | 4,95 |  |  |  |  |  |  |  |  |
|  |  | 30 | 16 | 2 |  |  | 4,08 |  |  | -34 | 26 | -6 |  |  | 4,55 |  |  |  |  |  |  |  |  |
|  | Parahippocampus-hippocampal gyrus | 24 | -24 | -18 | 56 | 448 | 4,11 |  |  |  |  |  |  |  |  |  |  |  |  |  |  |  |  |
|  | Supplementary motor area-Mid cingulum | -4 | -6 | 52 | 126 | 1008 | 4,09 |  |  |  |  |  |  |  |  |  |  |  |  |  |  |  |  |
|  |  | 6 | -2 | 50 |  |  | 4,06 |  |  |  |  |  |  |  |  |  |  |  |  |  |  |  |  |
|  |  | -4 | -14 | 54 |  |  | 3,51 |  |  |  |  |  |  |  |  |  |  |  |  |  |  |  |  |
|  | Hippocampus | -26 | -18 | -14 | 89 | 712 | 4,01 |  |  |  |  |  |  |  |  |  |  |  |  |  |  |  |  |
|  | Inferior temporal gyrus | 46 | -66 | -8 | 77 | 616 | 3,85 |  |  |  |  |  |  |  |  |  |  |  |  |  |  |  |  |
|  |  | 44 | -76 | -2 |  |  | 3,65 |  |  |  |  |  |  |  |  |  |  |  |  |  |  |  |  |
|  | **SEED COORDINATES (x,y,z): 6,-48,36** |  |  |  |  |  |  |  |  |  |  |  |  |  |  |  |  |  |  |  |  |  |  |
|  | Insula | 44 | 8 | -8 | 322 | 2576 | 5,80 |  | Insula | 44 | 10 | -8 | 282 | 2256 | 4,94 |  | No areas |  |  |  |  |  |  |
|  |  |  | 34 | 26 | 0 |  |  | 4,64 |  |  | 46 | 14 | 0 |  |  | 4,59 |  |  |  |  |  |  |  |  |
|  |  |  | 38 | 12 | 0 |  |  | 4,52 |  |  | 38 | 12 | 0 |  |  | 4,22 |  |  |  |  |  |  |  |  |
|  |  | Insula | -44 | 14 | -6 | 398 | 3184 | 5,69 |  | Superior temporal gyrus/Insula | -58 | -16 | 8 | 215 | 1720 | 4,92 |  |  |  |  |  |  |  |  |
|  |  |  | -46 | 22 | -6 |  |  | 5,41 |  |  | -44 | -22 | 10 |  |  | 4,30 |  |  |  |  |  |  |  |  |
|  |  |  | -34 | 14 | 2 |  |  | 4,86 |  |  | -46 | -10 | 6 |  |  | 3,97 |  |  |  |  |  |  |  |  |
|  |  | Superior temporal gyrus | 54 | -4 | 4 | 40 | 320 | 5,06 |  | Superior temporal gryus | 58 | -2 | 8 | 40 | 320 | 4,58 |  |  |  |  |  |  |  |  |
|  |  | Superior temporal gyrus | -52 | -18 | 10 | 193 | 1544 | 4,95 |  |  | 54 | -10 | 6 |  |  | 4,11 |  |  |  |  |  |  |  |  |
|  |  |  | -40 | -10 | 0 |  |  | 4,54 |  | Insula | -48 | 24 | -6 | 356 | 2848 | 4,50 |  |  |  |  |  |  |  |  |
|  |  |  | -48 | -22 | 2 |  |  | 3,89 |  |  | -32 | 24 | -4 |  |  | 4,42 |  |  |  |  |  |  |  |  |
|  |  | Supplementary motor area/Mid cingulum | -4 | -2 | 52 | 364 | 2912 | 4,89 |  |  | -34 | 16 | 0 |  |  | 4,16 |  |  |  |  |  |  |  |  |
|  |  |  | 0 | 16 | 48 |  |  | 4,49 |  | Inferior temporal gyrus | 46 | -68 | -8 | 46 | 368 | 3,62 |  |  |  |  |  |  |  |  |
|  |  |  | -4 | 6 | 48 |  |  | 4,45 |  |  | 42 | -76 | -6 |  |  | 3,41 |  |  |  |  |  |  |  |  |
|  |  | Inferior frontal gyrus | -54 | 10 | 24 | 52 | 416 | 4,12 |  |  |  |  |  |  |  |  |  |  |  |  |  |  |  |  |
|  |  |  | -50 | 14 | 34 |  |  | 3,00 |  |  |  |  |  |  |  |  |  |  |  |  |  |  |  |  |
|  |  | Inferior parietal cortex | -38 | -44 | 50 | 45 | 360 | 3,71 |  |  |  |  |  |  |  |  |  |  |  |  |  |  |  |  |
|  |  |  | -30 | -48 | 56 |  |  | 3,62 |  |  |  |  |  |  |  |  |  |  |  |  |  |  |  |  |
|  |  | Inferior temporal cortex | 48 | -76 | -4 | 73 | 584 | 3,69 |  |  |  |  |  |  |  |  |  |  |  |  |  |  |  |  |
|  |  |  | 46 | -66 | -8 |  |  | 3,26 |  |  |  |  |  |  |  |  |  |  |  |  |  |  |  |  |
|  |  |  | 38 | -76 | 0 |  |  | 2,98 |  |  |  |  |  |  |  |  |  |  |  |  |  |  |  |  |
|  |  | Hippocampus | -26 | -16 | -12 | 42 | 336 | 3,36 |  |  |  |  |  |  |  |  |  |  |  |  |  |  |  |  |
|  |  |  | -24 | -26 | -12 |  |  | 3,18 |  |  |  |  |  |  |  |  |  |  |  |  |  |  |  |  |

Footnote: **a** Activity co-ordinates (x, y, z) are given in Montreal Neurological Institute (MNI) Atlas space. **b** Magnitude and extent statistics correspond to a minimum threshold of *P* **FWE***<* 0.05 (cluster corrected at whole-brain). KE = cluster size. BA= Brodmann area. To avoid smoothing-induced correlations, resting state reported coordinates were only those located outside a 16mm tridimensional radius distance from the seed coordinate (2xFWHM of the Gausian filter used in the smoothing=16mm).
